# Supplementary material for: Neglected solid phase pentavalent plutonium carbonate in the environment
Source: Royal Society of Chemistry journal article supplement (doi:10.1039/d4en00283k), 2024-01-01
Supplement: d4en00283k2.pdf [file d4en00283k2.pdf]

## Supplementary information

**Table S1.** Conditions of Pu precipitation experiments

| Experiment   | Carbonate source                                    | [CO <sub>3</sub> <sup>2-</sup> ], M   | pH                                             | pH buffer                                           | Volume, mL |
|--------------|-----------------------------------------------------|---------------------------------------|------------------------------------------------|-----------------------------------------------------|------------|
| Experiment A | Dissolved CO <sub>2</sub> (g)                       | ~10 <sup>-4</sup> –10 <sup>-3</sup> * | 8.4 ± 0.2                                      | TRIS                                                | 10         |
| Experiment B | Dissolved CO <sub>2</sub> (g)                       | ~10 <sup>-4</sup> –10 <sup>-3</sup> * | 8.4 ± 0.1                                      | TRIS                                                | 10         |
| Experiment C | Dissolved CO <sub>2</sub> (g)                       | ~10 <sup>-4</sup> –10 <sup>-3</sup> * | 8.2 ± 0.1                                      | TRIS                                                | 45         |
| Experiment D | Na <sub>2</sub> CO <sub>3</sub> /NaHCO <sub>3</sub> | 0.04                                  | 8.6 ± 0.5                                      | Na <sub>2</sub> CO <sub>3</sub> /NaHCO <sub>3</sub> | 10         |
| Experiment E | Dissolved CO <sub>2</sub> (g)                       | ~10 <sup>-4</sup> –10 <sup>-3</sup> * | pH range<br>from 2 to 10 in increments<br>of 2 | —                                                   | 10         |

\* — maximum dissolved carbonates, based on a theoretical calculation by HYDRA/MEDUSA software, Fig. S1.

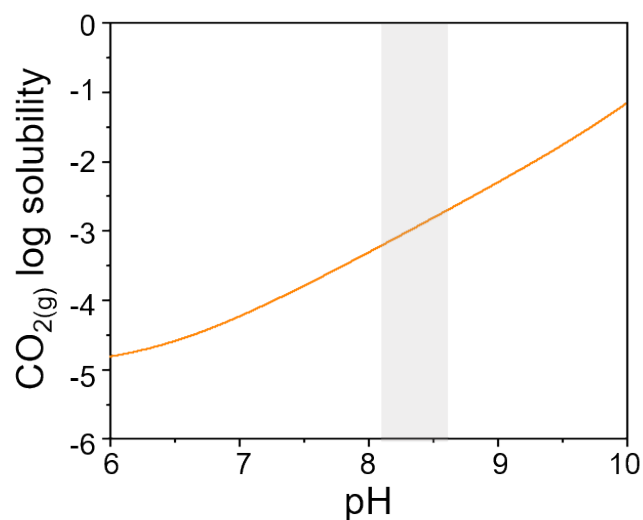

**Figure S1.** Solubility graph of CO<sub>2</sub>(g) calculated by HYDRA/MEDUSA software. The gray area shows the pH conditions corresponding to Experiments A, B, C, and E.

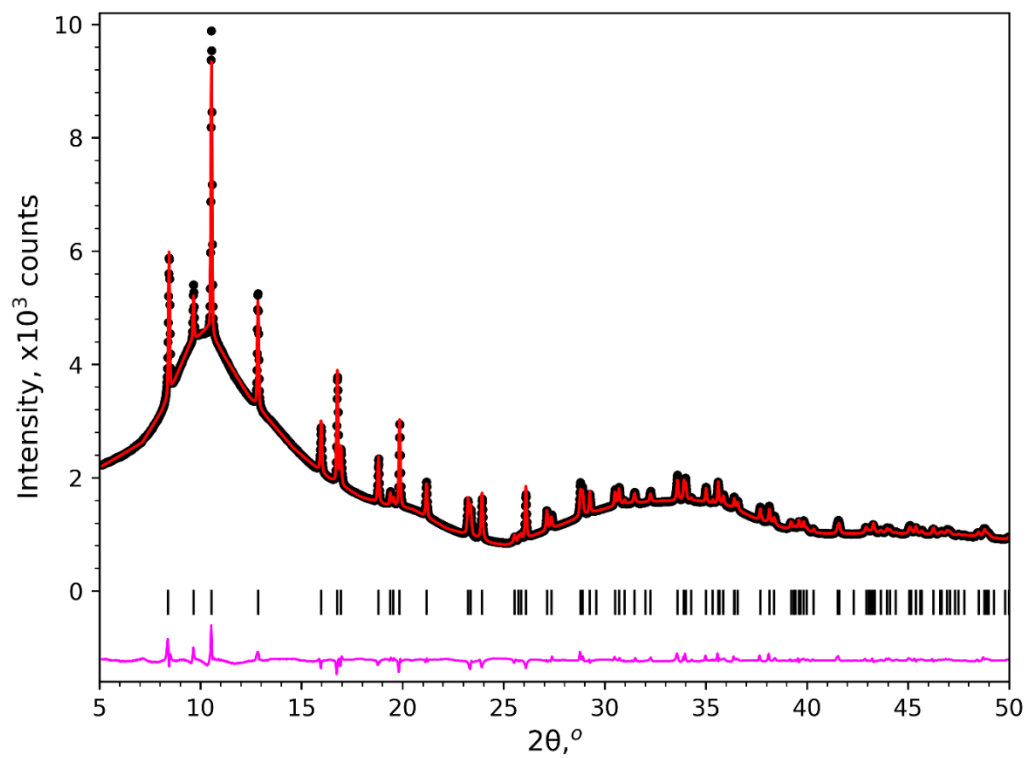

**Figure S2.** Rietveld refinement plot ( $\lambda = 0.74 \text{ \AA}$ ) of the powder XRD pattern of  $\text{KPuO}_2\text{CO}_3$ . Experimental data (black markers), refined fit (red solid line), difference profile (offset magenta line), and positions of Bragg peaks (vertical bars).

**Table S2.** Crystal and refinement data for the structure of  $\text{KPuO}_2\text{CO}_3$ .

|                                                                           |                            |
|---------------------------------------------------------------------------|----------------------------|
| Formula                                                                   | $\text{KPuO}_2\text{CO}_3$ |
| Formula weight                                                            | 375.1                      |
| Diffractometer                                                            | Belok/XSA BL               |
| Wavelength (Å)                                                            | 0.74                       |
| Data collection method                                                    | Debye–Scherrer             |
| Temperature (K)                                                           | 293(2)                     |
| Crystal system                                                            | hexagonal                  |
| Space group                                                               | $P6_3/mmc$                 |
| Temperature (K)                                                           | 293                        |
| a (Å)                                                                     | 5.0746(3)                  |
| b (Å)                                                                     | 5.0746(3)                  |
| c (Å)                                                                     | 10.0472(11)                |
| $\alpha$ (°)                                                              | 90                         |
| $\beta$ (°)                                                               | 90                         |
| $\gamma$ (°)                                                              | 120                        |
| V (Å <sup>3</sup> )                                                       | 224.07(3)                  |
| Z                                                                         | 2                          |
| $D_{\text{calc}}$ (g·cm <sup>-3</sup> )                                   | 5.5598                     |
| $\mu$ (mm <sup>-1</sup> )                                                 | 20.334                     |
| 2 $\theta$ range, °                                                       | 5.108–49.999               |
| Number of reflections                                                     | 110                        |
| Parameters, restraints                                                    | 29, 1                      |
| $R_p$ , $\omega R_p$                                                      | 0.0107, 0.0167             |
| $R_{\text{Bragg}}$                                                        | 0.0644                     |
| $\Delta\rho_{\text{min}}$ , $\Delta\rho_{\text{max}}$ (eÅ <sup>-3</sup> ) | -3.35, 5.41                |

**Table S3.** Selected bond distances (Å) in the structure of  $\text{KPuO}_2\text{CO}_3$ . Symmetry codes: (i)  $1 - y, 1 - x, 0.5 - z$ ; (ii)  $-1 + x, x - y, 0.5 - z$ ; (iii)  $-x + y, y, 0.5 - z$ ; (iv)  $1 - y, 1 + x - y, z$ ; (v)  $x, 1 + x - y, 0.5 - z$ ; (vi)  $1 - y, x - y, z$ .

| Parameter                                                                                                                      | Bond distance (Å) |
|--------------------------------------------------------------------------------------------------------------------------------|-------------------|
| Pu1–O2<br>Pu1–O2 <sup>i</sup>                                                                                                  | 1.799(2)          |
| Pu1–O1<br>Pu1–O1 <sup>ii</sup><br>Pu1–O1 <sup>iii</sup><br>Pu1–O1 <sup>iv</sup><br>Pu1–O1 <sup>v</sup><br>Pu1–O1 <sup>vi</sup> | 2.54(3)           |
| O1–C1                                                                                                                          | 1.36(3)           |
| K1–O2 <sup>i</sup> x6                                                                                                          | 3.0152(8)         |
| K1–O1 <sup>i</sup> x6                                                                                                          | 2.964(17)         |

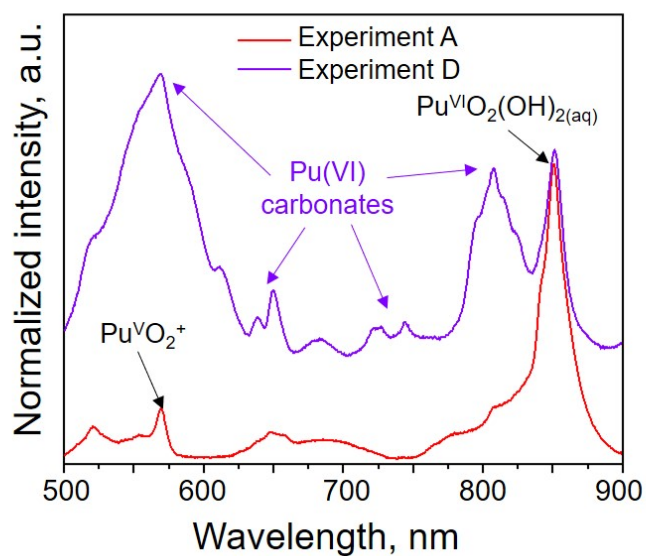

Figure S3. UV-Vis spectra of solutions from Experiments A and D after 5 days.

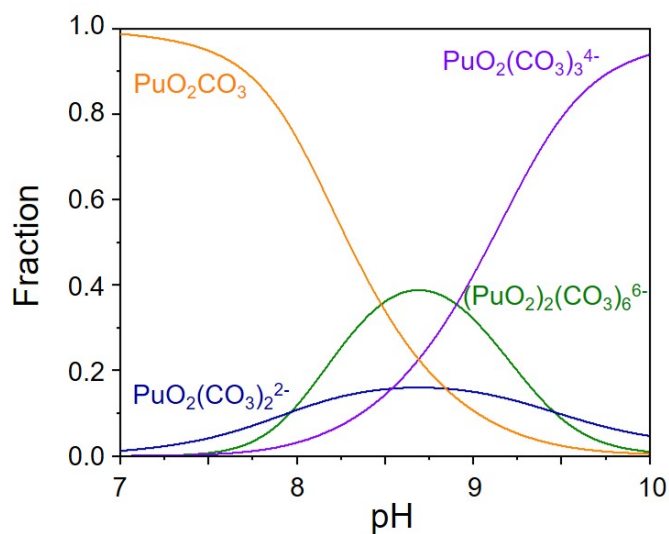

Figure S4. Predominant Pu(VI) carbonate species in solution with  $[\text{CO}_3^{2-}] = 0.04 \text{ M}$ ,  $[\text{PuO}_2^{2+}] = 1 \times 10^{-4} \text{ M}$ , calculated by HYDRA/MEDUSA software.

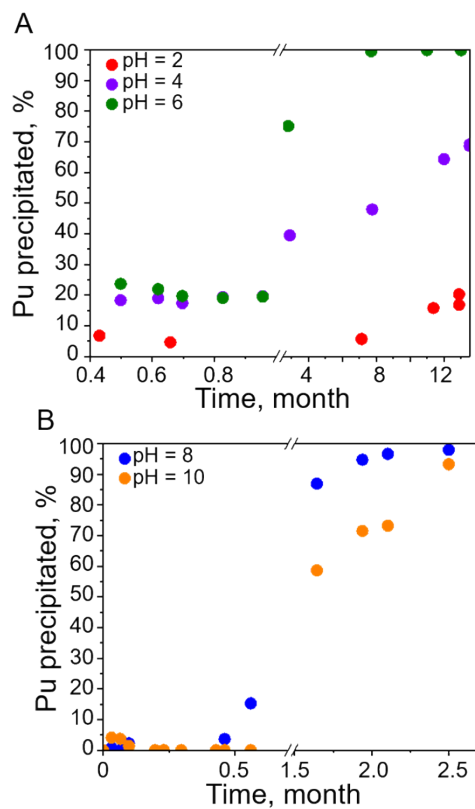

Figure S5. Dependence of Pu precipitated percentage on time in Experiment E with (A) pH = 2, 4, 6, and 12; (B) pH = 8, 10.

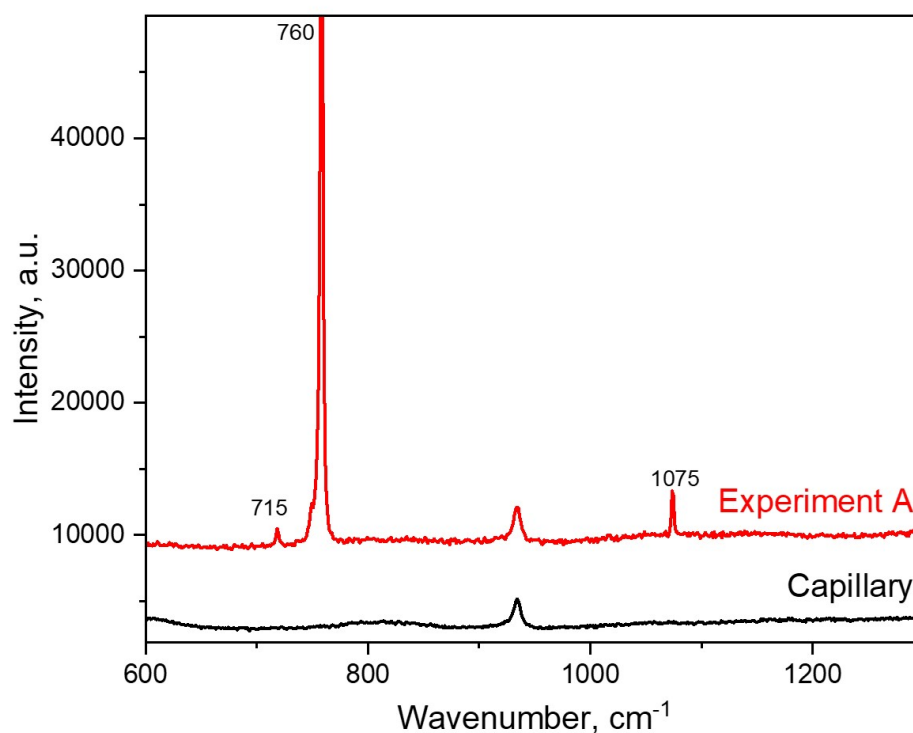

Figure S6. Raman spectra of the solid phase from Experiment A placed into quartz capillary in comparison to empty capillary

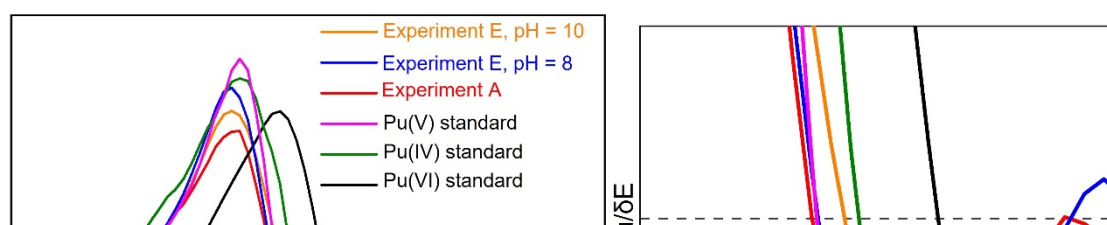

Figure S7. XANES first derivative spectra of the experimental results compared to Pu(VI, V and IV) standards with magnification of zero-crossing (right).

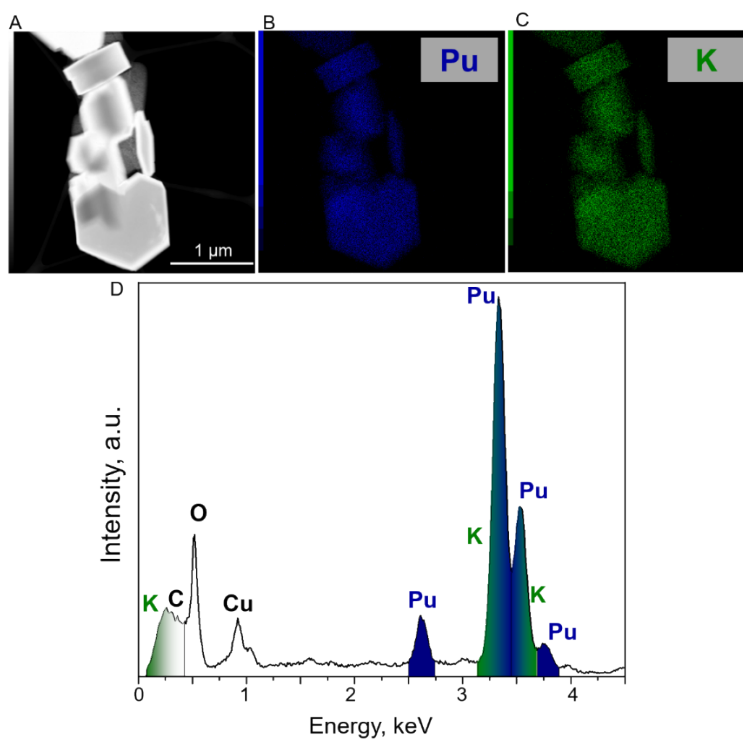

Figure S8. (A) HRTEM image; (B, C) Maps of Pu and K components; (D) EDX spectrum of solid phase precipitated in Experiment A.
